# Supplementary material
Source: PubMed Central journal article supplement (PMC5316376)
Supplement: NIHMS847023-supplement-6.pdf [file NIHMS847023-supplement-6.pdf]

## mDia2 and CXCL12/CXCR4 Chemokine Signaling Intersect to Drive Tumor Cell Amoeboid Morphological Transitions

Meghan M. Wyse<sup>a</sup>, Silvia Goicoechea<sup>b</sup>, Rafael Garcia-Mata<sup>b</sup>, Andrea L. Nestor-Kalinoski<sup>c</sup>, and Kathryn M. Eisenmann<sup>a\*</sup>

<sup>a</sup>Department of Biochemistry and Cancer Biology, University of Toledo Health Science Campus, Toledo, Ohio 43614 USA; <sup>b</sup>Department of Biological Sciences, University of Toledo, Toledo, Ohio 43606 USA; <sup>c</sup>Department of Surgery, University of Toledo, Health Science Campus, Toledo, Ohio 43614 USA.

\*Corresponding author: Department of Biochemistry and Cancer Biology, University of Toledo Health Science Campus, 3000 Arlington Ave, Mail Stop 1010, Toledo, Ohio 43614 USA, Telephone: (419) 383-4101; E-mail: [Kathryn.eisenmann@utoledo.edu](mailto:Kathryn.eisenmann@utoledo.edu)

Supplementary Table 1. shRNA sequences for RhoGEFs used in this study

| shRNA# | p115                    | Net1                    | LARG                      | ECT2                    | PDZ                     |
|--------|-------------------------|-------------------------|---------------------------|-------------------------|-------------------------|
| 1      | CCTTTGAACT<br>TGACCGCAC | CCCGAGGTG<br>AACAGGATTT | CGTCCGATCTT<br>CCTTGAGTTT | CCAGCAATGA<br>TAAGCATGT | CCTGGATCTT<br>ACAACCAGA |
| 2      | CATGGCAGAA<br>TGCCTGTTC | GCTTTCAGTA<br>ACTCAGAGA | CCACTCAAATG<br>CAAAGGCTTA | GCCCGTTGTA<br>TTGTACAAG | CCTGATCTTC<br>TACCAGCGA |
| 3      | CCATCTCTAC<br>CGACGAAGA | CGCCTAGTCA<br>AATACCCTT | GCGTTGCGTA<br>ATCATCCAG   | CGGGTTGAAA<br>CAATTTCTC | CGACCGGAT<br>CATCAAAGTC |
| 4      | CACCGATCAC<br>AAAGCCTTC | CCAAAGCTCT<br>TCTTGATCA | CCAGAAGTTCA<br>AAGGCACT   | GCTGAGCATT<br>CCCTTTCCA | GCGAAACCT<br>ATCCTCAA   |
| 5      | TCCCTGAAGC<br>AGCTTCTGT | GAGTGGACAT<br>AAACTTTAC |                           | CGGAATGAAC<br>AGGATTTCT |                         |
